# Supplementary material for: Discovery of Rho-kinase inhibitors by docking-based virtual screening
Source: Royal Society of Chemistry journal article supplement (doi:10.1039/c3mb00016h), 2013-03-08
Supplement: c3mb00016h.pdf [file c3mb00016h.pdf]

## Supporting Materials

**Table S1.** Nine physiochemical and ADMET properties for compounds 13 and 24

|                                        | Compound 24 | Compound 13 |
|----------------------------------------|-------------|-------------|
| Molecular weight                       | 393.49      | 357.79      |
| H-bond donors                          | 2           | 3           |
| H-bond acceptors                       | 9           | 6           |
| TPSA                                   | 111.39      | 95.68       |
| Rotatable bonds                        | 6           | 4           |
| log <i>P</i> (ACD/labs)                | 2.34        | 2.96        |
| Passive absorption                     | 100%        | 100%        |
| Solubility (log <i>S<sub>w</sub></i> ) | -3.69       | -4.75       |
| Protein binding (PPB)                  | 98%         | 97%         |
